# Supplementary material for: Synthesis of a Side Chain Alkyne Analogue of Sitosterol as a Chemical Probe for Imaging in Plant Cells
Source: MDPI journal article supplement (doi:10.3390/biom14050542), 2024-04-30

# **Synthesis of a Side Chain Alkyne Analogue of Sitosterol as a Chemical Probe for Imaging in Plant Cells**

**MMiriam Hollweck, David Jordan and Franz Bracher \***

## **Supporting Information**

**$^1\text{H}$  and  $^{13}\text{C}$  NMR spectra of the synthesized compounds**

(24*R*,25*RS*)-26-Ethynyl-26-norstigmast-5-ene-3 $\beta$ -ol, FB-DJ-1 (**4**)

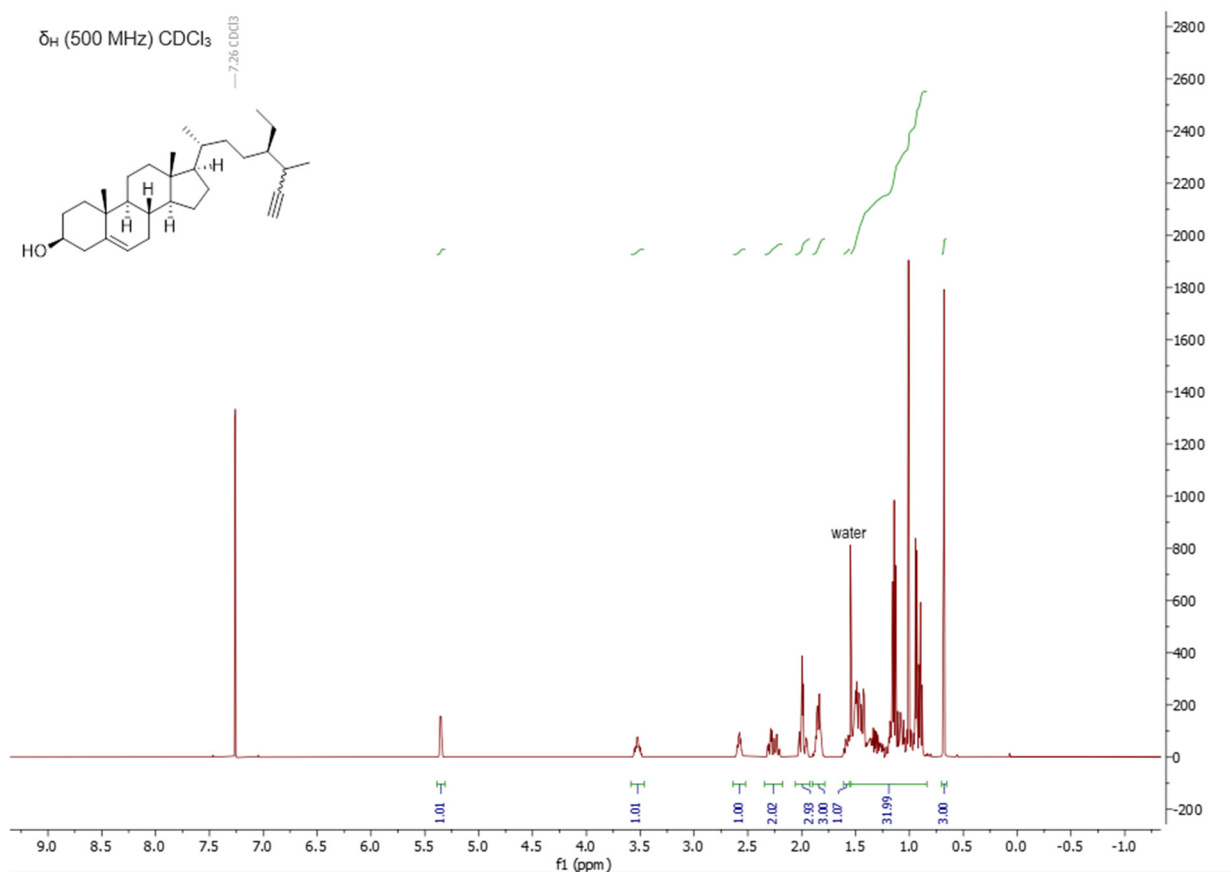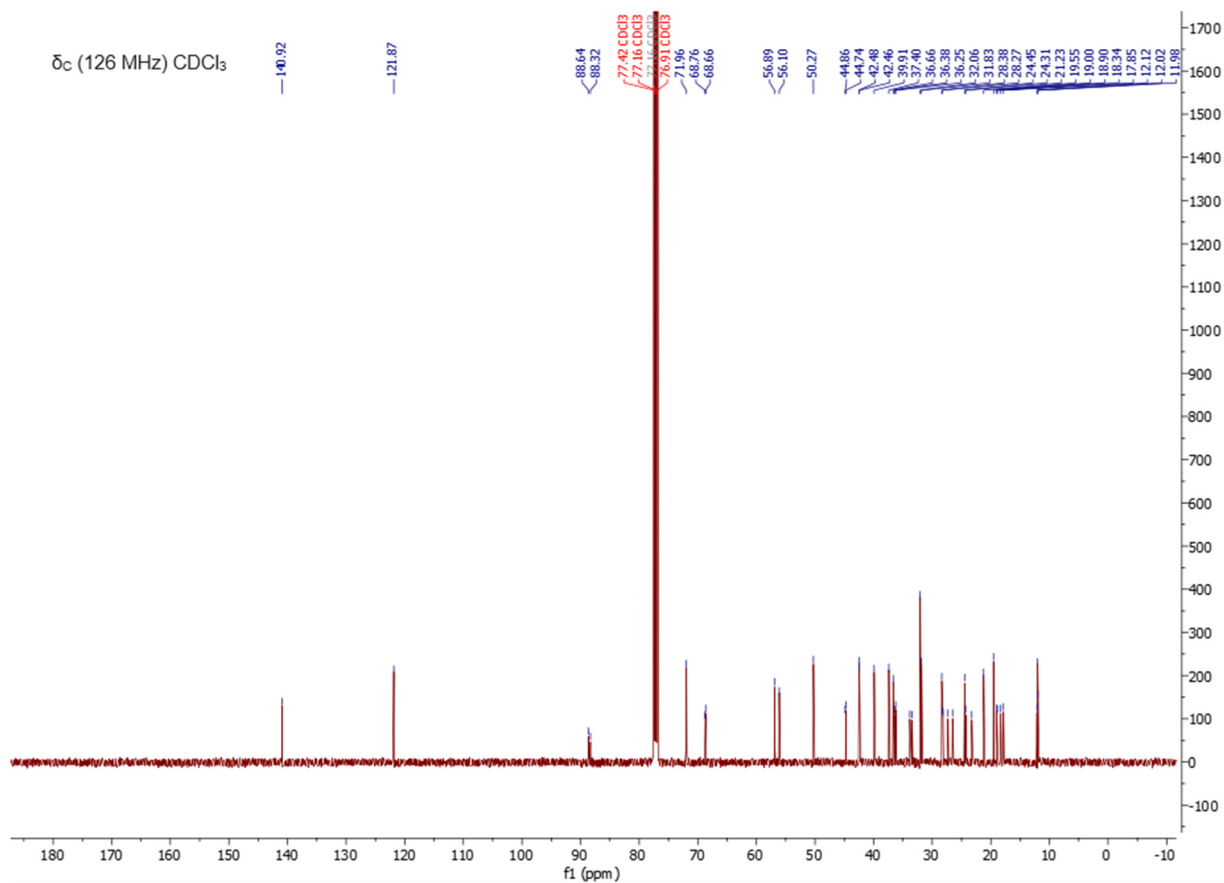

(22*R*)-6β-Methoxy-3α,5-cyclo-27-nor-5α-cholest-23-yn-22-ol (**9a**)

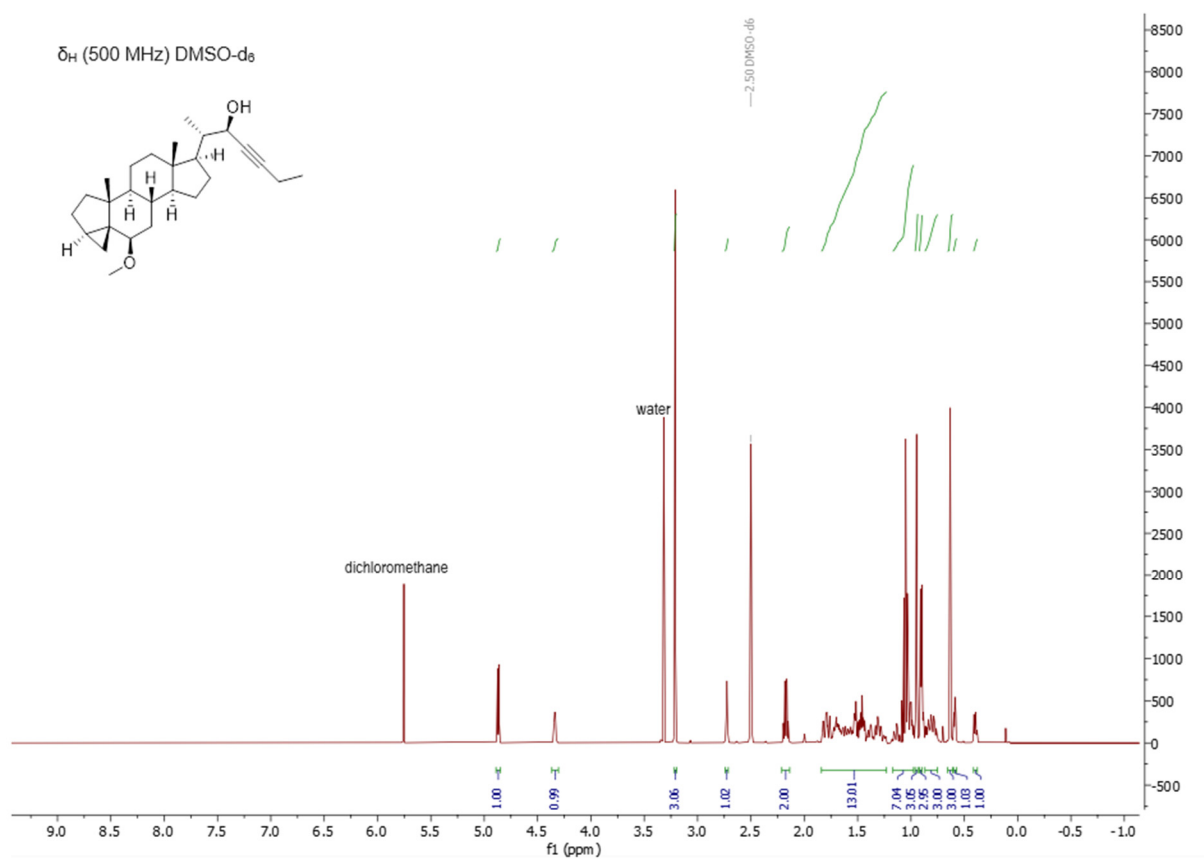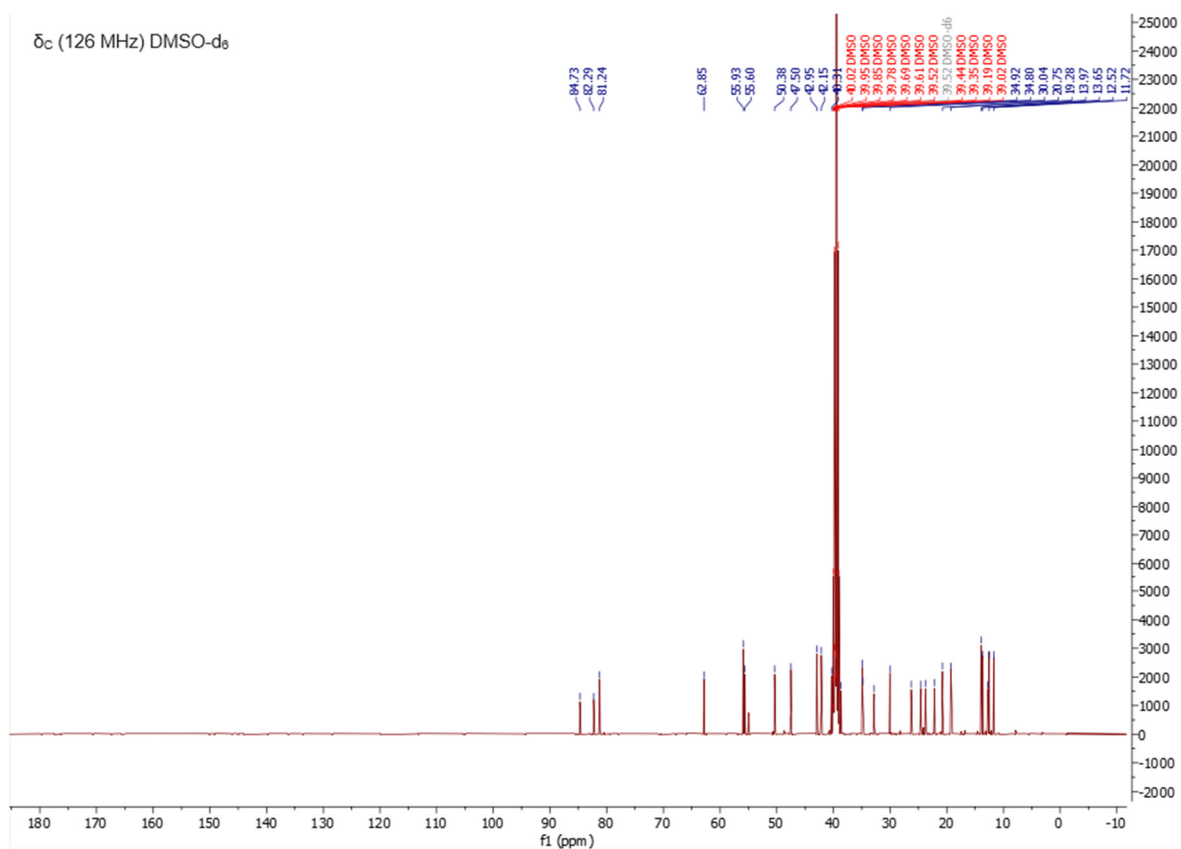

(22S)-6 $\beta$ -Methoxy-3 $\alpha$ ,5-cyclo-27-nor-5 $\alpha$ -cholest-23-yn-22-ol (**9b**)

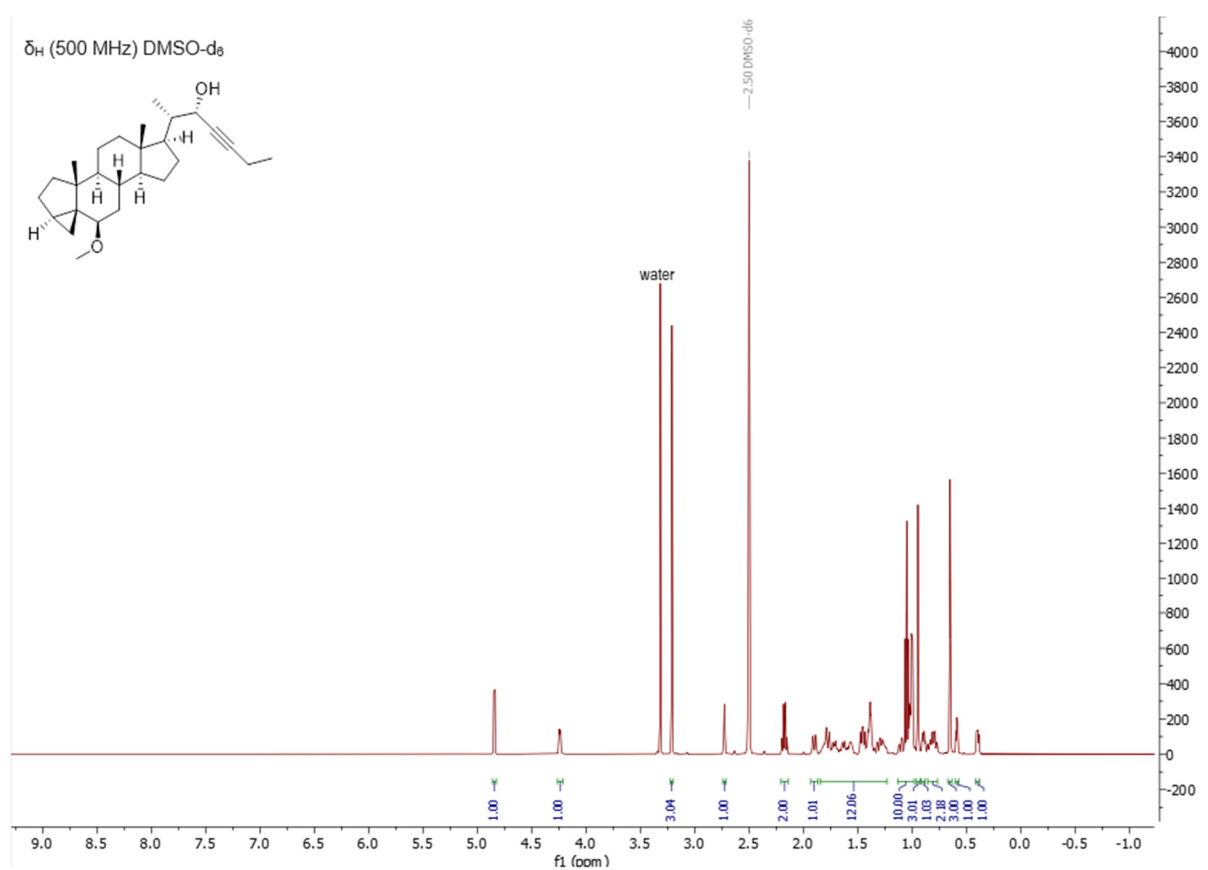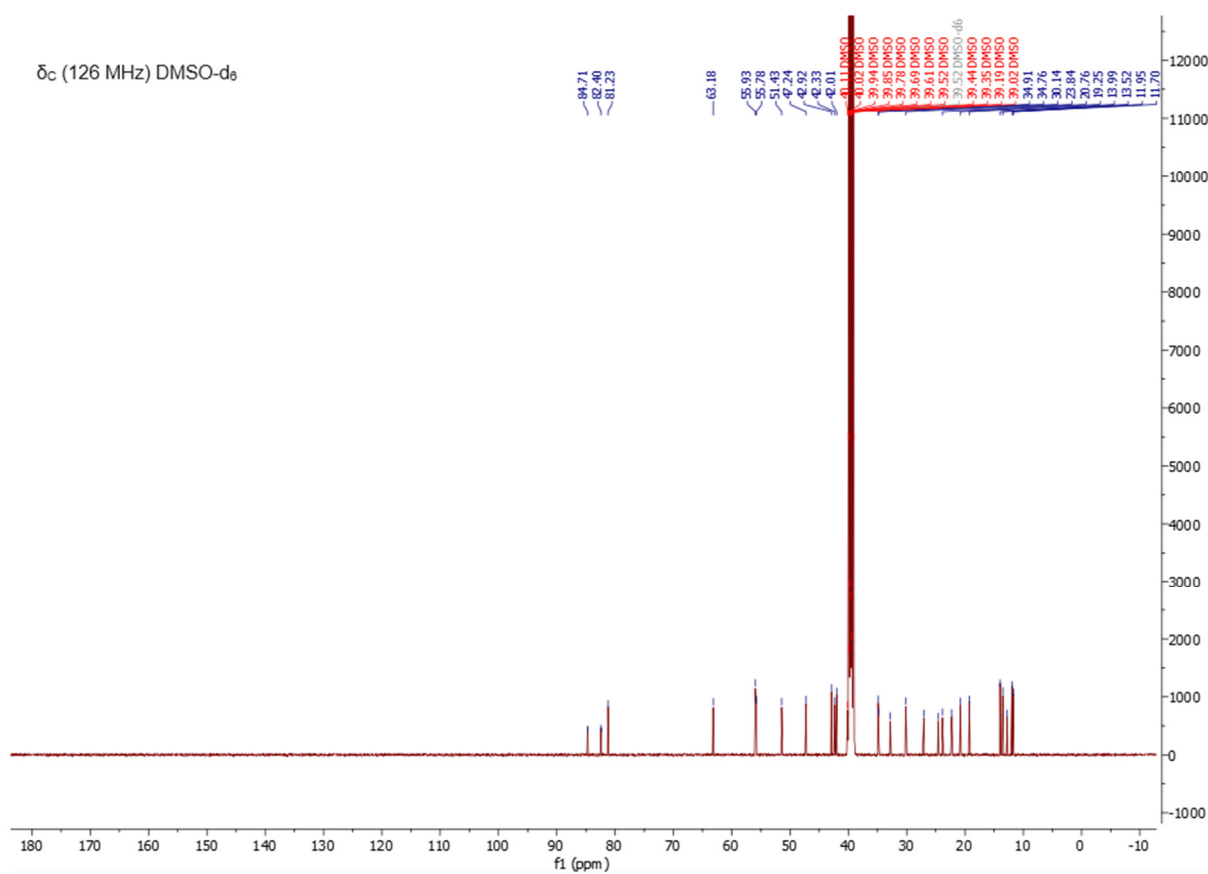

(22*R*,23*Z*)-6 $\beta$ -Methoxy-3 $\alpha$ ,5-cyclo-27-nor-5 $\alpha$ -cholest-23-en-22-ol (**10a**)

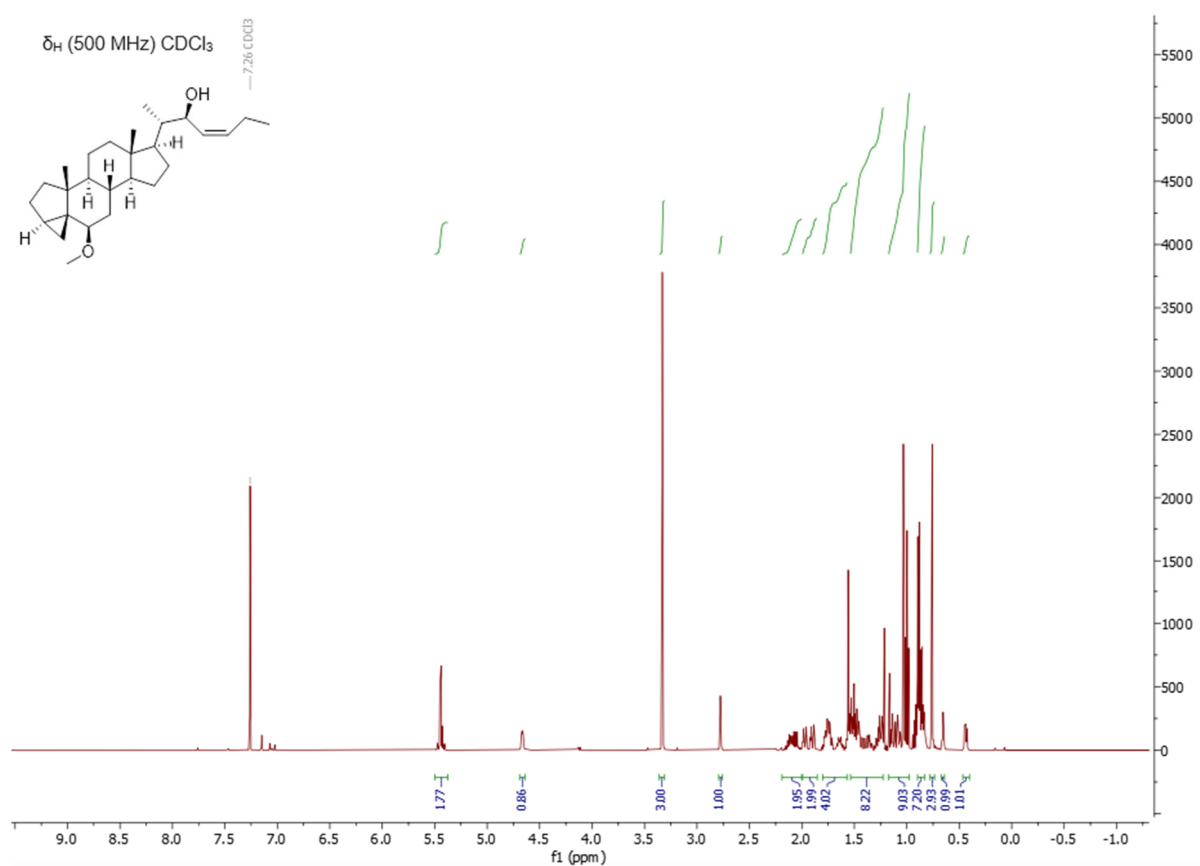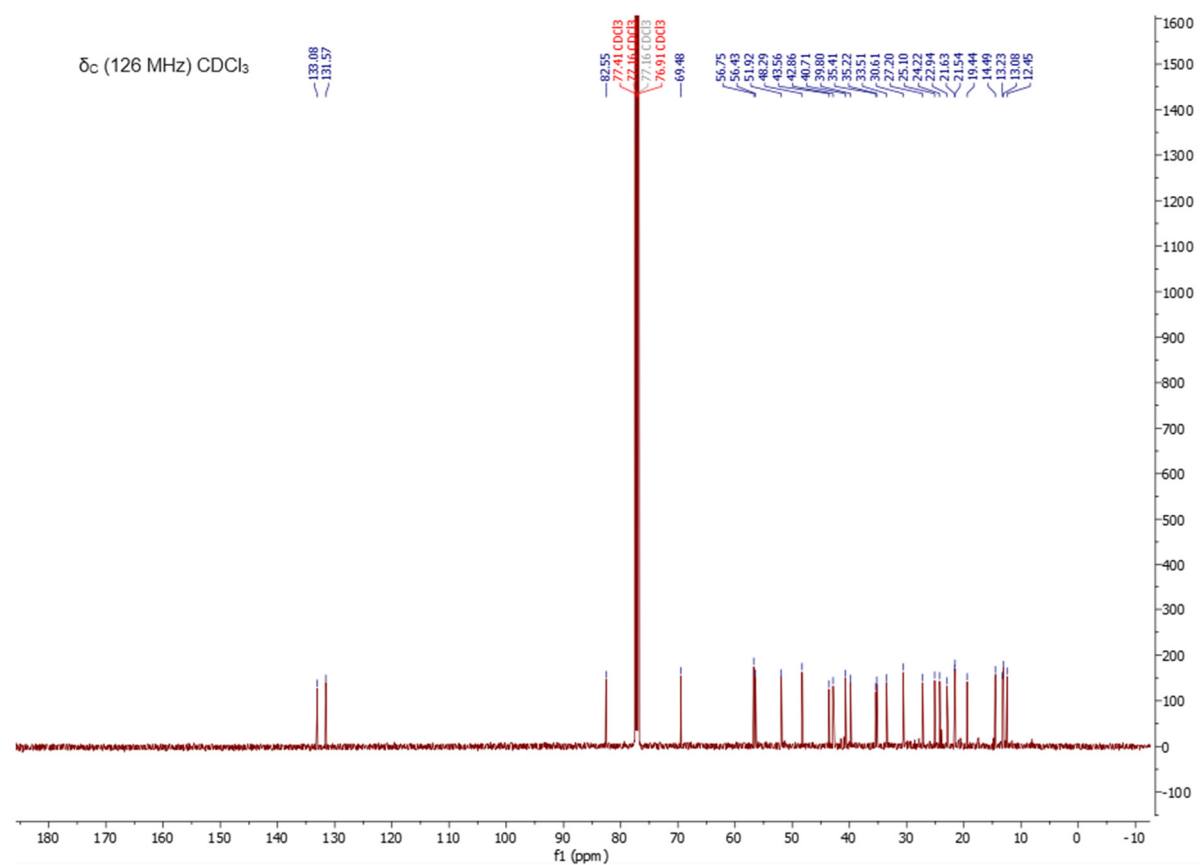

(22*R*,23*E*)-6β-Methoxy-3α,5-cyclo-27-nor-5α-cholest-23-en-22-ol (**10b**)

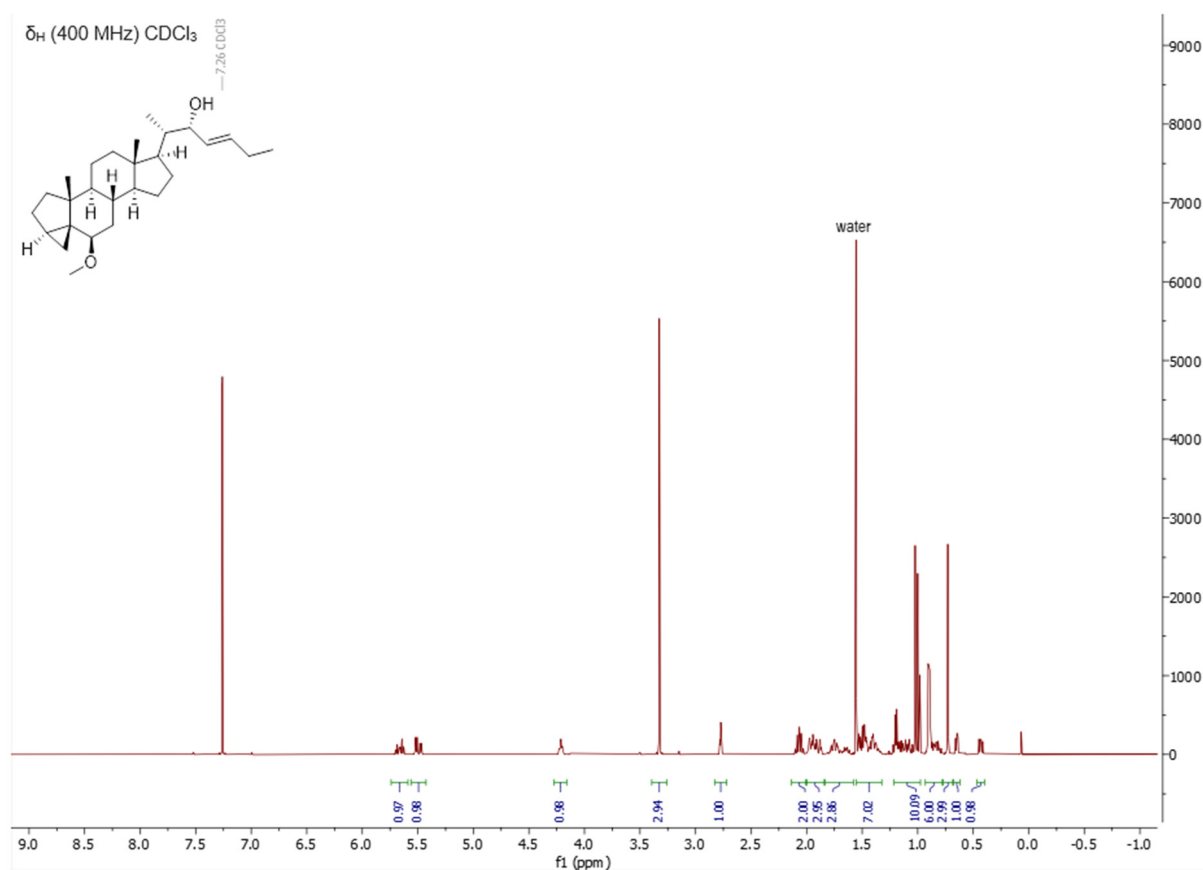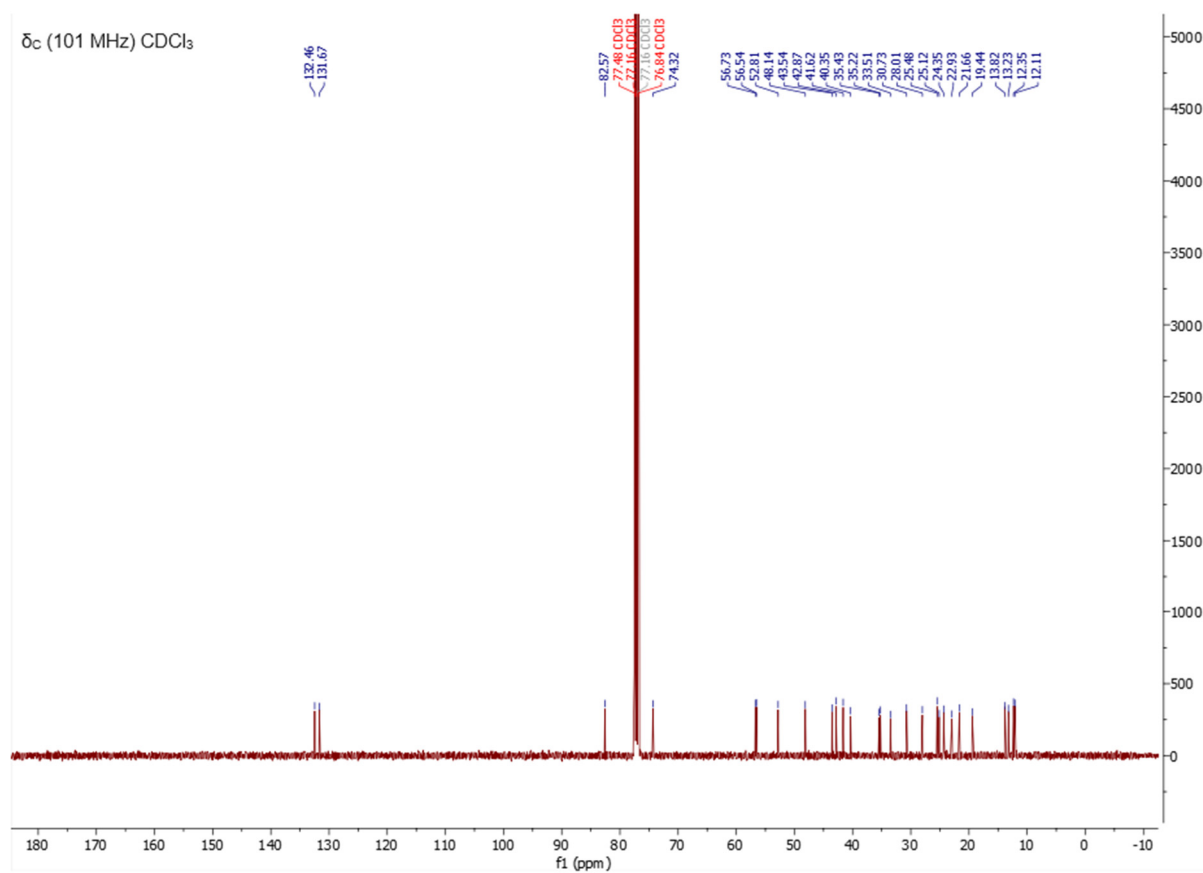

Ethyl-(22*E*,24*R*,25*RS*)-6 $\beta$ -Methoxy-3 $\alpha$ ,5-cyclo-5 $\alpha$ -stigmast-22-en-26-oate (**11**)

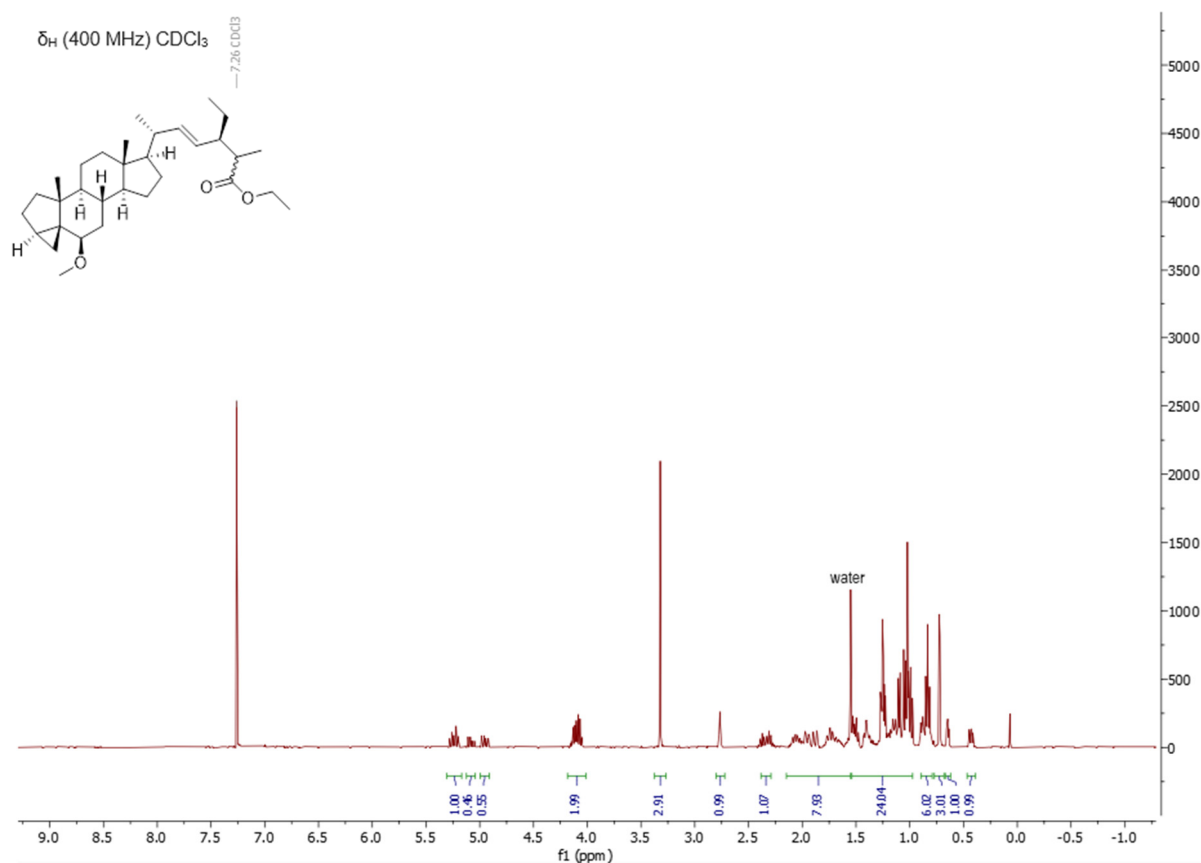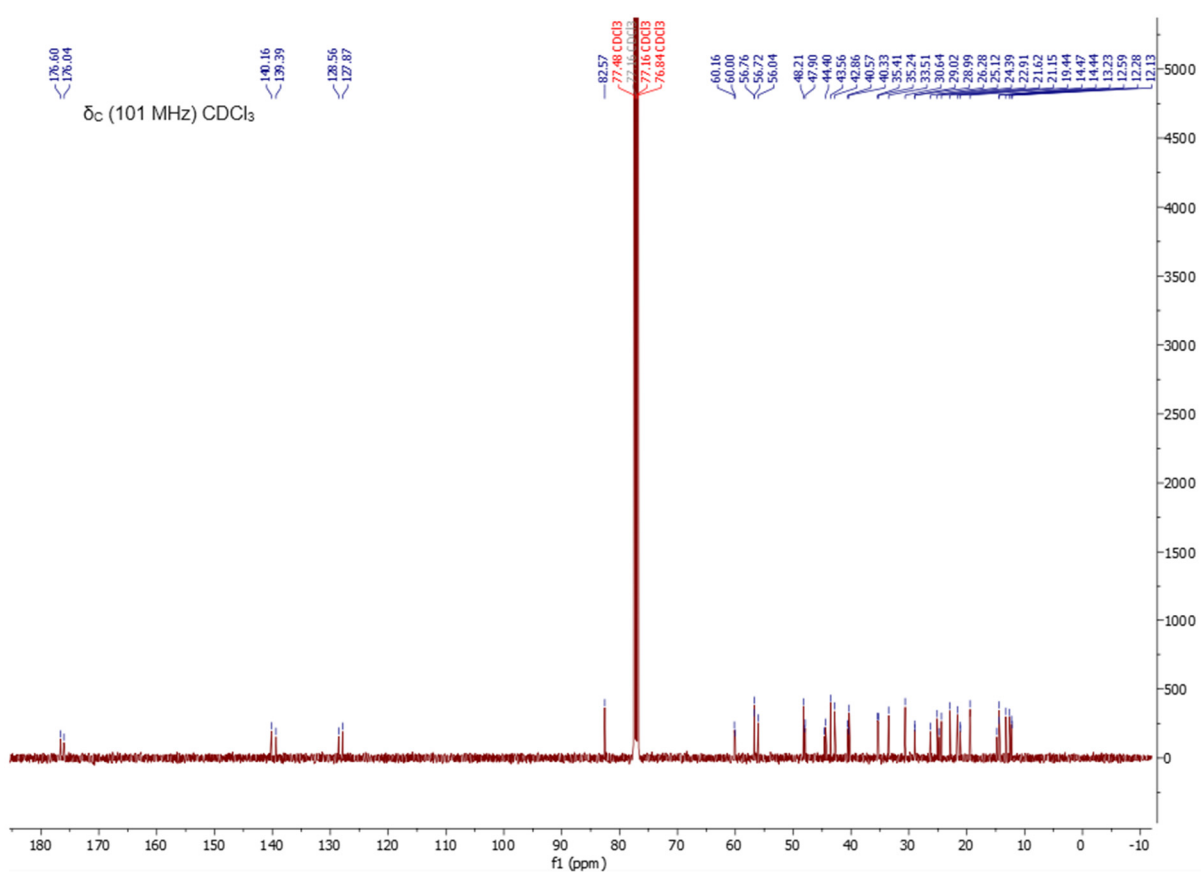

Ethyl-(24*R*,25*RS*)-6β-Methoxy-3α,5-cyclo-5α-stigmastan-26-oate (**12**)

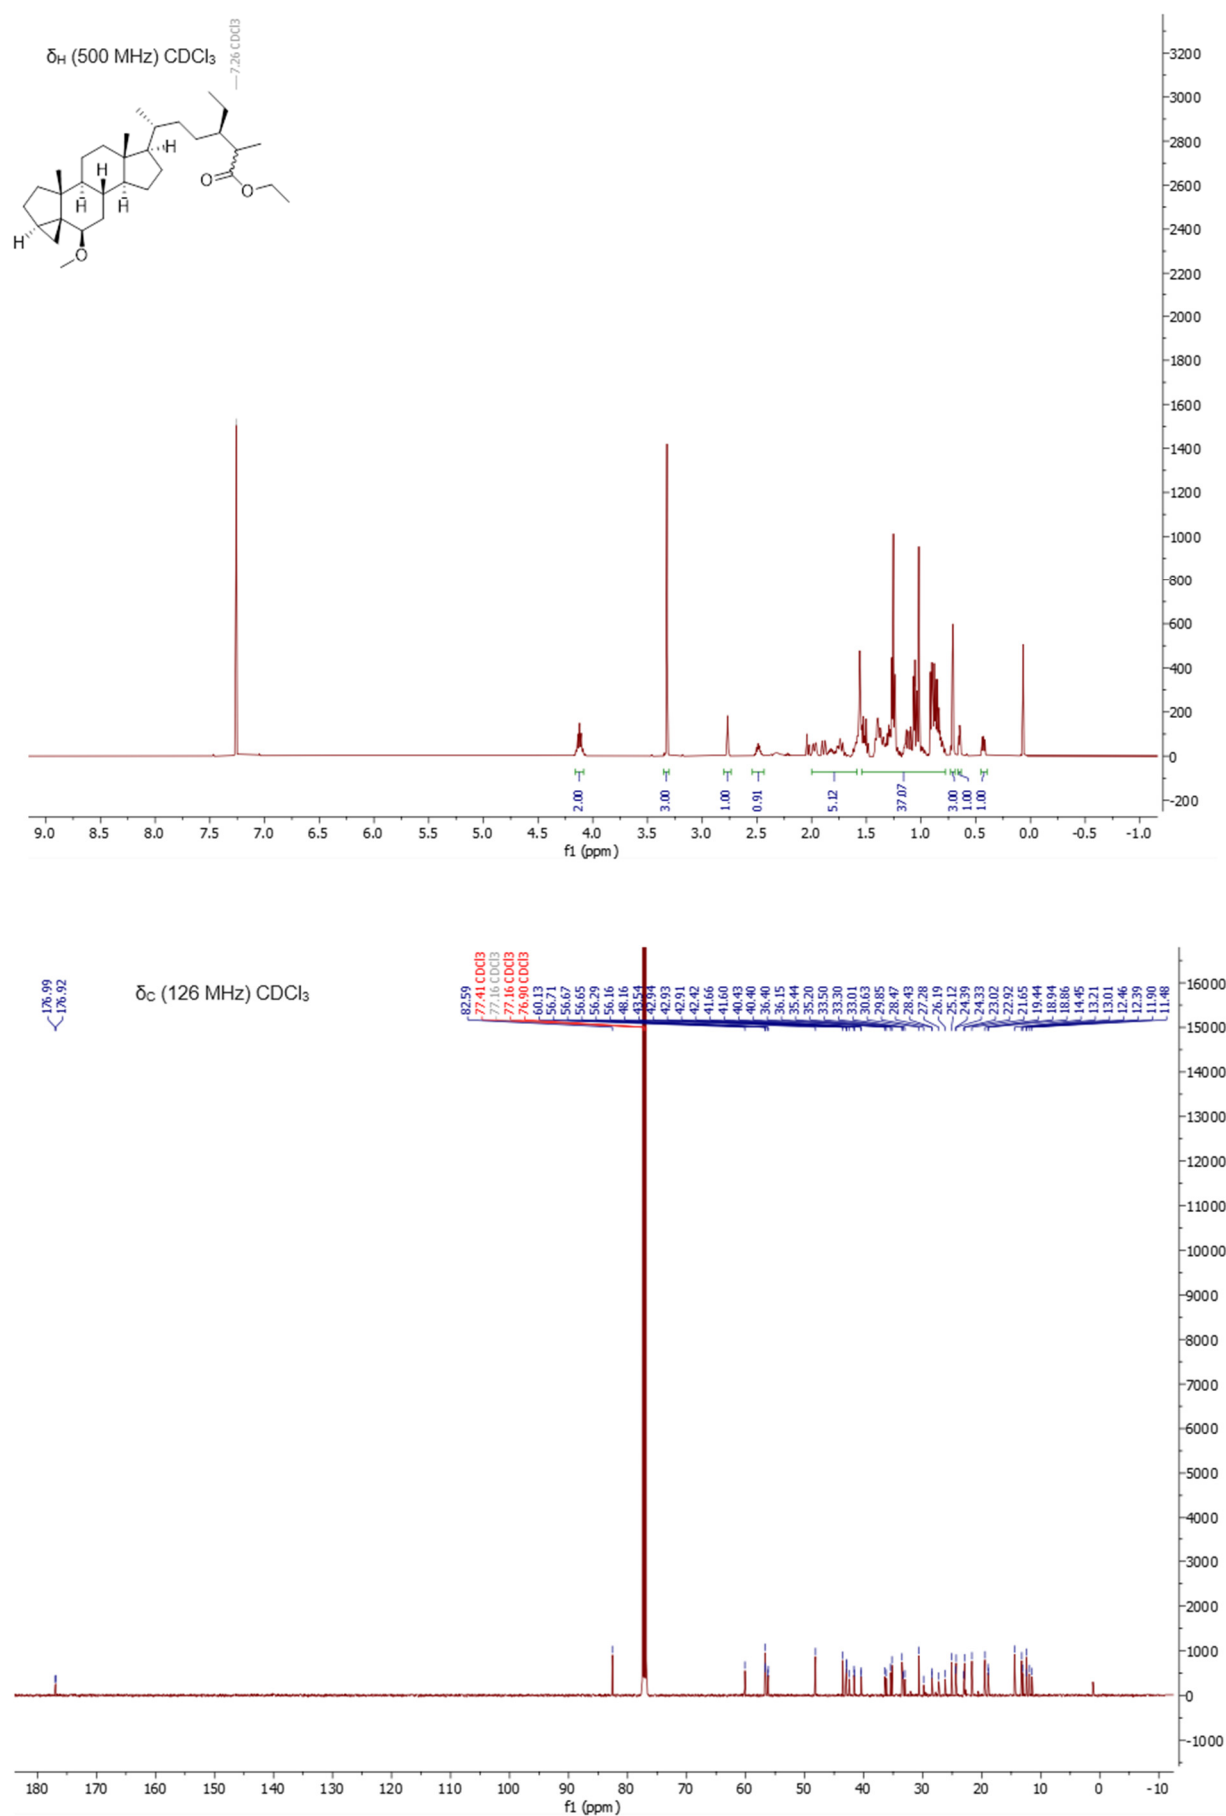



(24*R*,25*RS*)-6β-Methoxy-3α,5-cyclo-5α-stigmastan-26-ol (**13**)

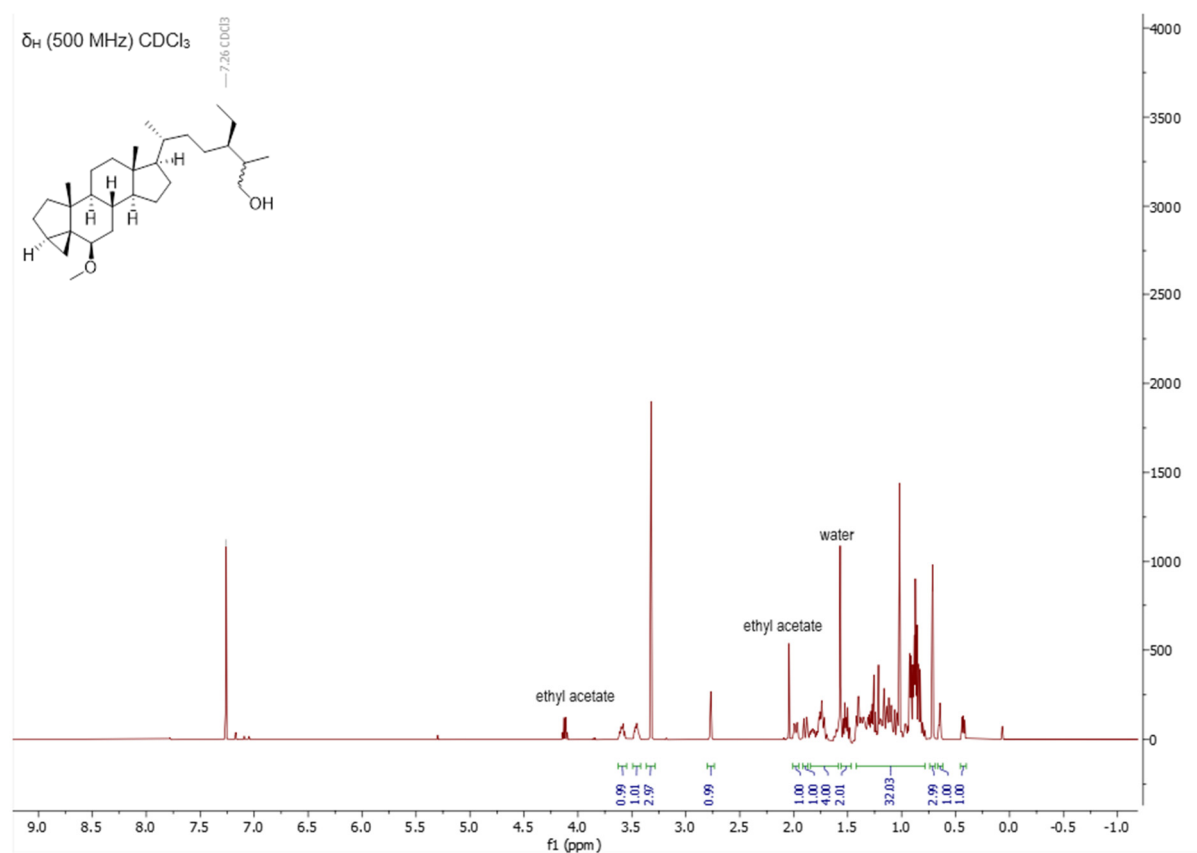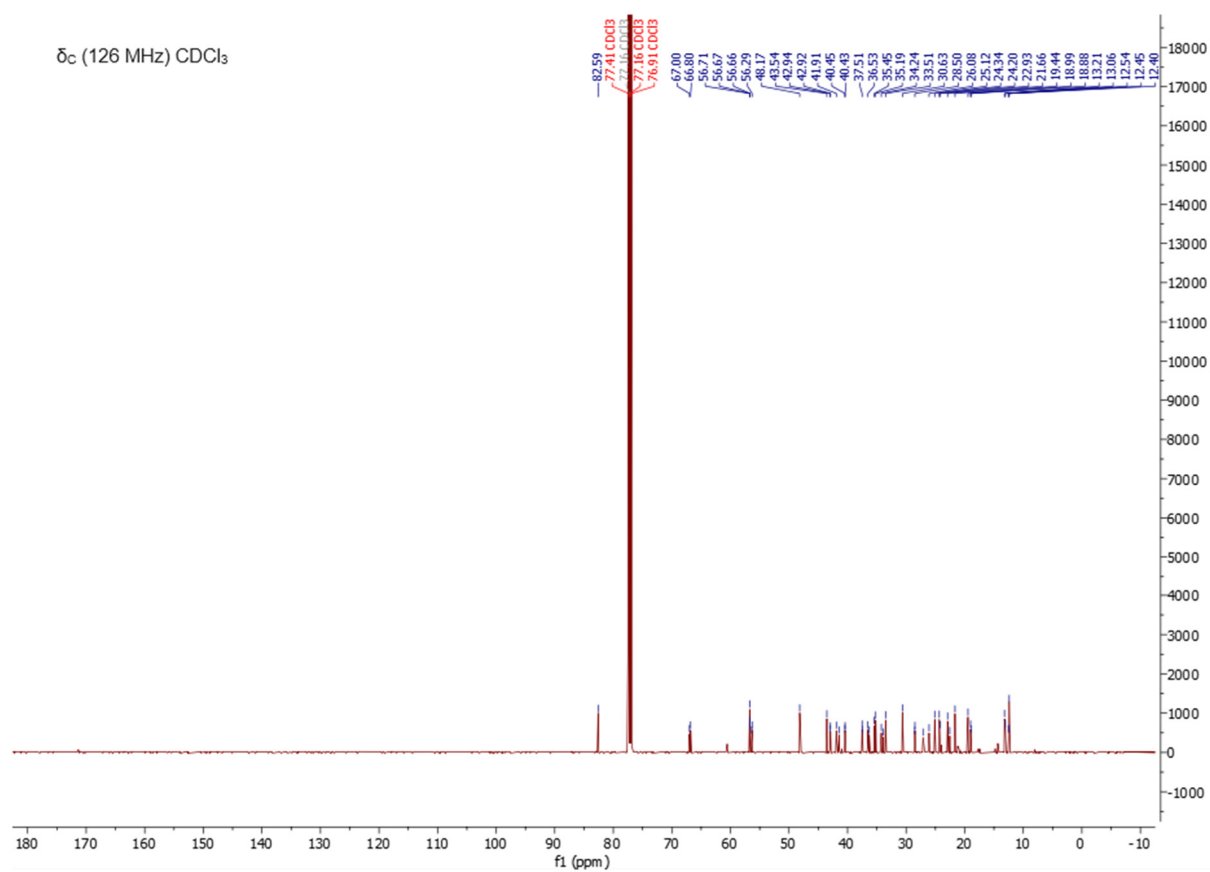

(24*R*,25*RS*)-26-Ethynyl-6 $\beta$ -methoxy-26-nor-3 $\alpha$ ,5-cyclo-5 $\alpha$ -stigmastane (**15**)

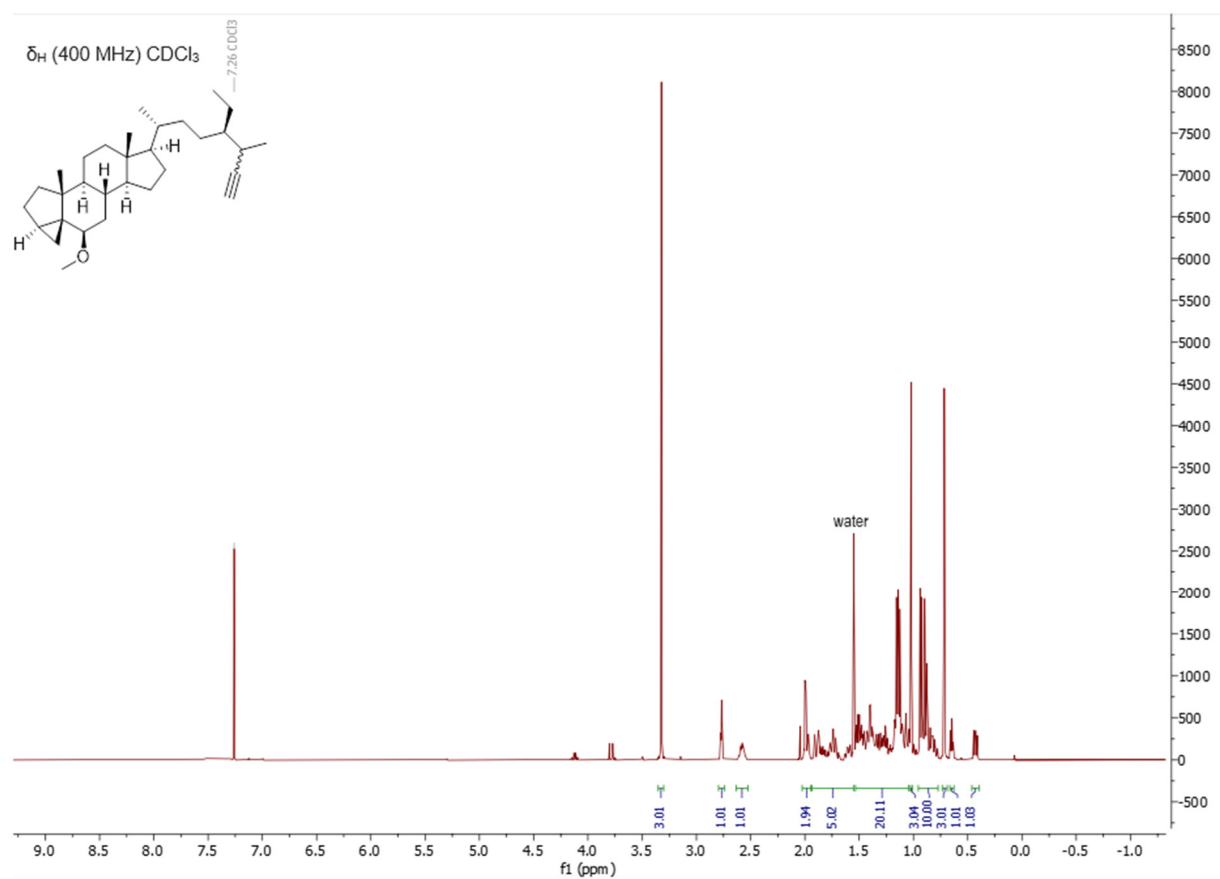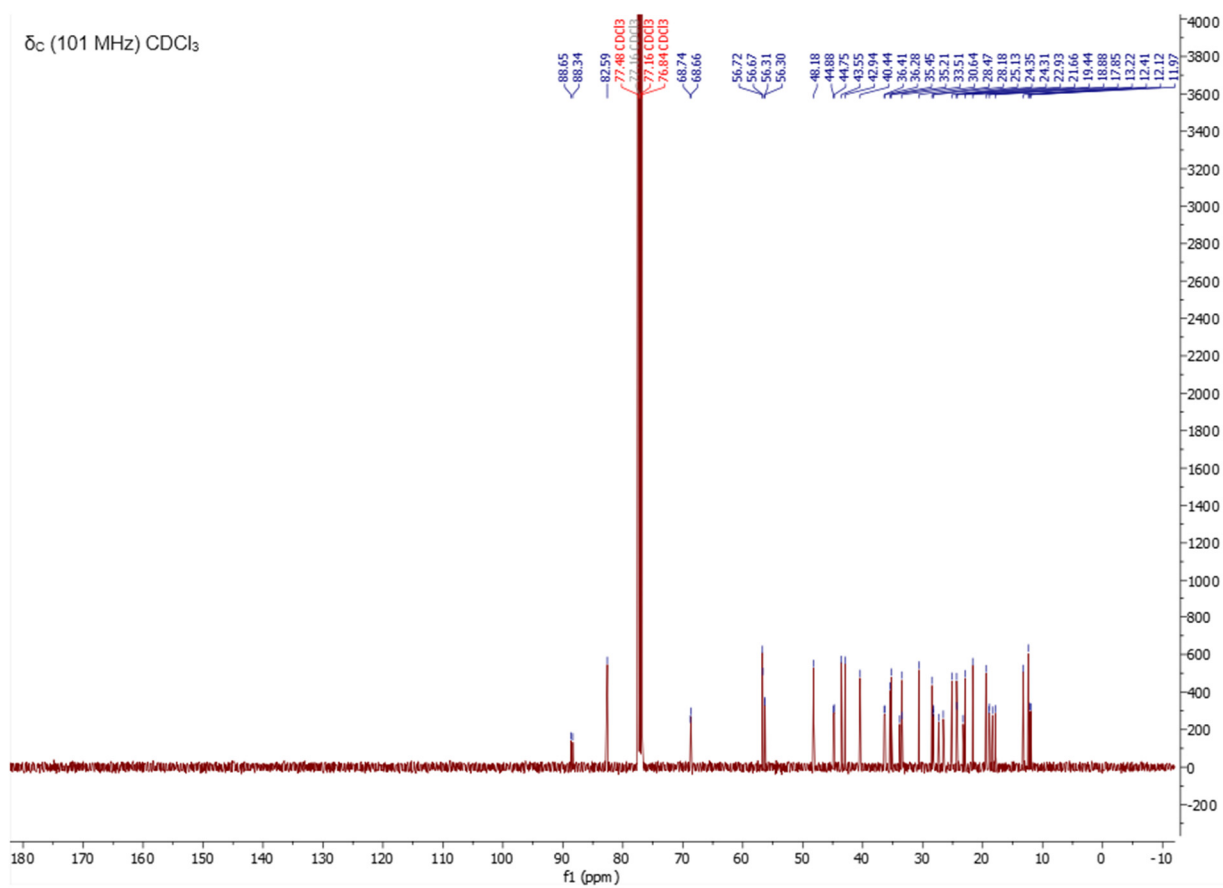

Supplement: s1 [file s1]
